# Supplementary material
Source: publisher figshare collection journal article supplement (https://geolsoc.figshare.com/ndownloader/files/21079845)
Supplement: Supplementary file 1 [file 21079845]

Journal of the Geological Society

Supporting Information for

**Evolution of a shear zone before, during and after melting**

Amicia L. Lee1,2*, Geoffrey E. Lloyd1, Taija Torvela1 & Andrew M. Walker1

*1School of Earth and Environment, University of Leeds, Leeds, UK*

*2Department of Geology, University of Tromsø, Tromsø, Norway*

**Corresponding author (e-mail: amicia.lee@uit.no)*

**Introduction**

Supporting information provides additional dihedral angle and EBSD data that was used in this study. Data includes dihedral angle plots to illustrate the data and trends in dihedral angles. Addition EBSD data of Euler maps for quartz-bearing samples (SIP24, 23/22, 21, 20,19,18,17,16, 15, 43, 12, 11), recrystallised and relict grain maps as generated by GOS analysis after Cross et al., (2017) and point per grain CPO pole figures.

**Figure S1:** Dihedral angle data for paragneiss samples in the ØSZ. (a) Representative photomicrographs of dihedral angles. (b) Distribution of the dihedral angles between mineral grain triple junctions for solid-solid-melt and solid-solid-solid triple junctions. (c) Holness-style plot of standard deviation vs. median angle for the two dihedral angle populations. Solid-solid-melt boundaries, ⚫, and solid-solid-solid boundaries, ◆. Also shown is a schematic diagram showing end-member solid-solid-melt dihedral angle populations (Adapted from Holness et al., 2006).


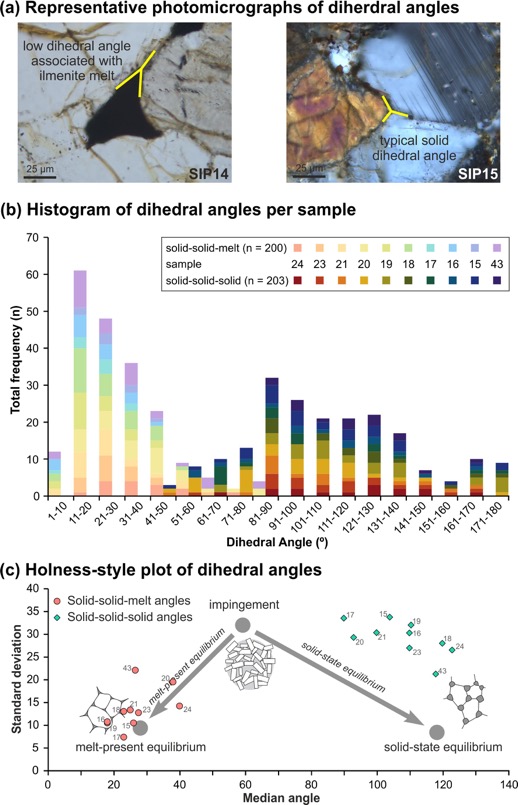


**Figure S2:** EBSD maps for quartz grains in ØSZ samples. Euler angle maps are shown first and correlate to the spectrum colour key below. Recrystallised and relict grains maps as generated by GOS analysis using the Cross et al., (2017) methodology. The key for recrystallised and relict grains is shown below for reference.

Euler colour key: Recrystallised/relict grain key


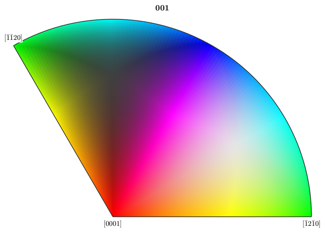


Recrystallised grains

Relict grains

**SIP24:**

**
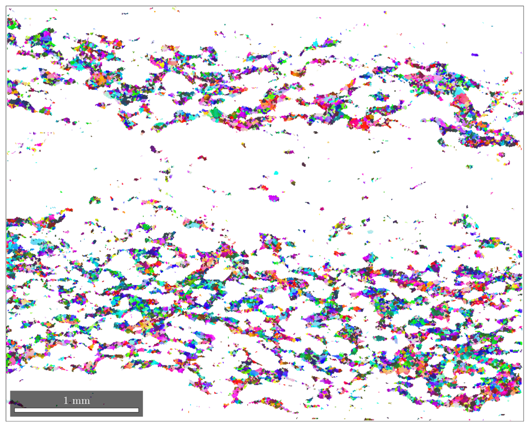
**

**
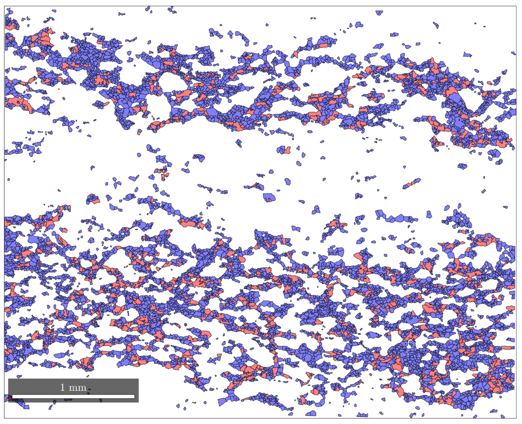
**

**SIP23:**

**
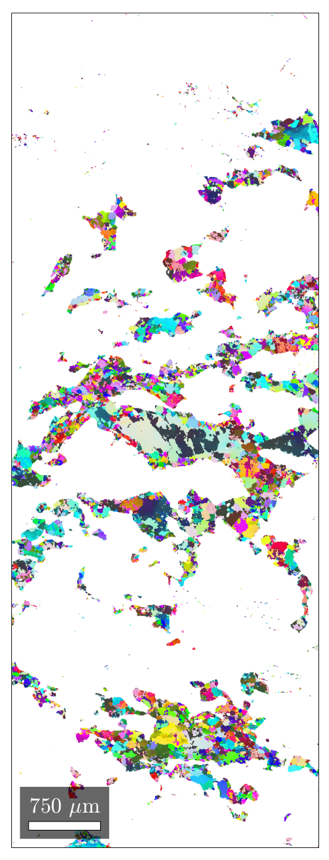

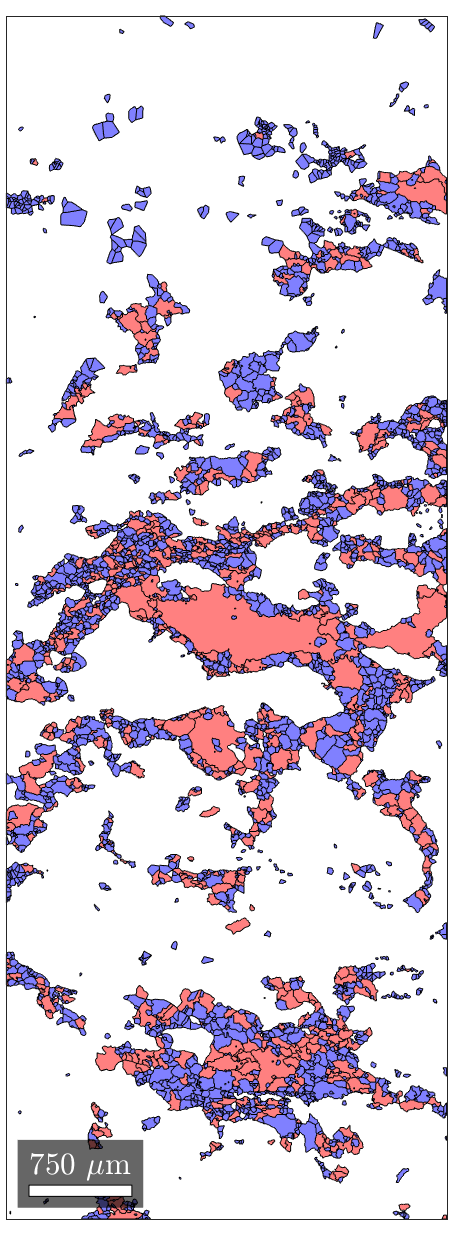
**

**SIP21:**

**
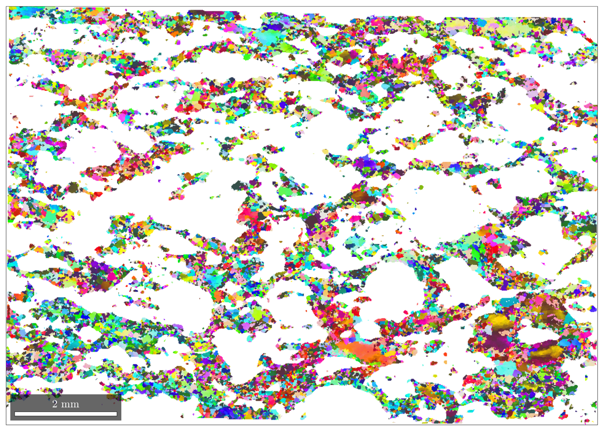
**

**
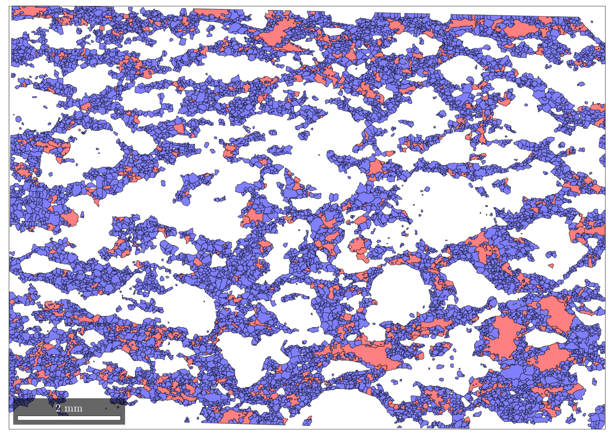
**

**SIP20:**

**
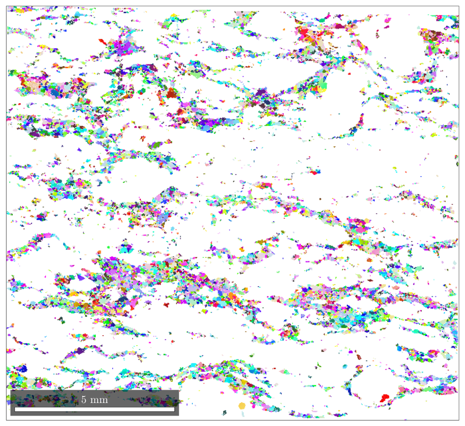
**

**
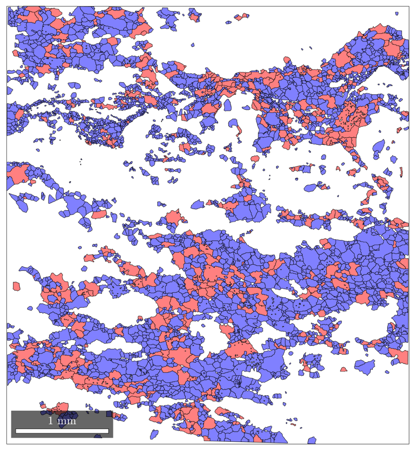
**

**SIP19:**

**
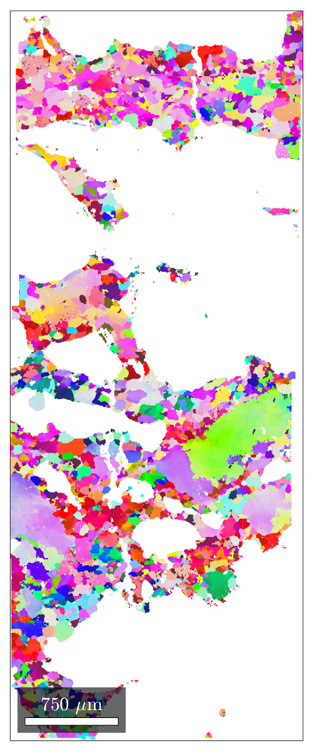

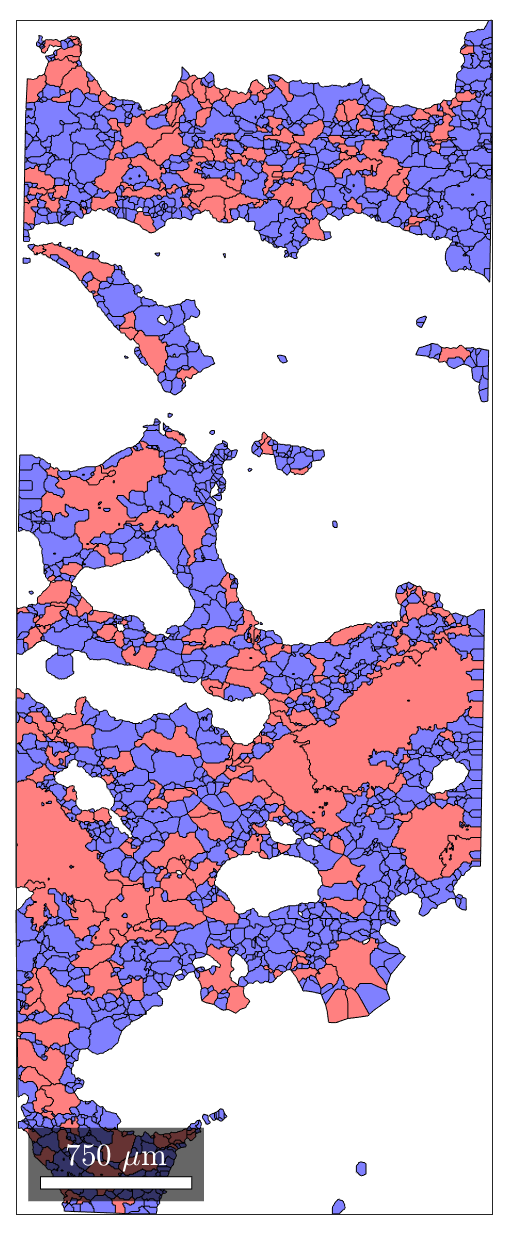
**

**SIP18:**

**
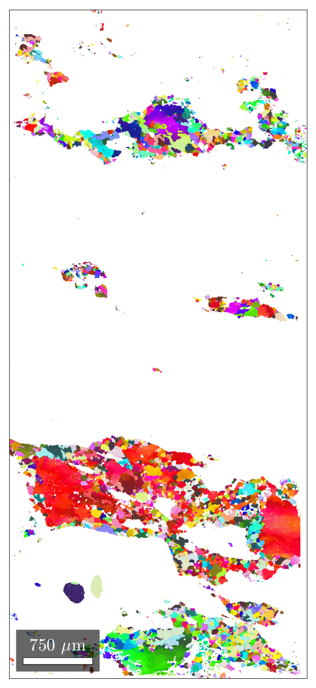

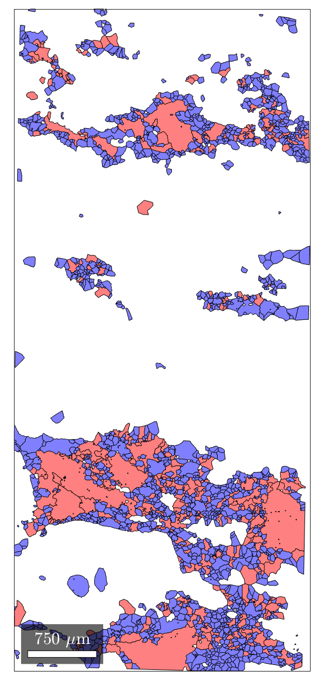
**

**SIP17:**

**
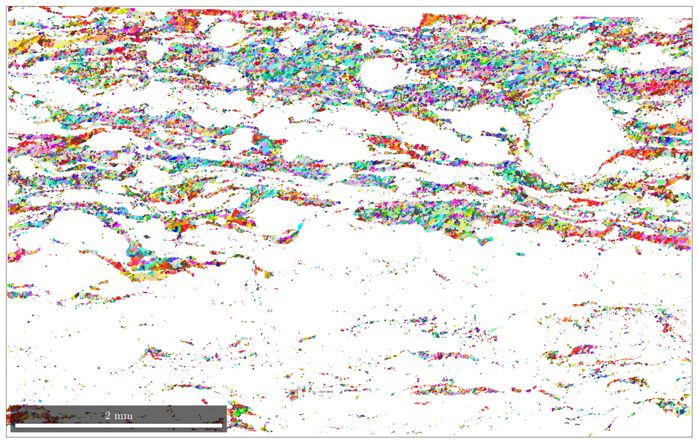

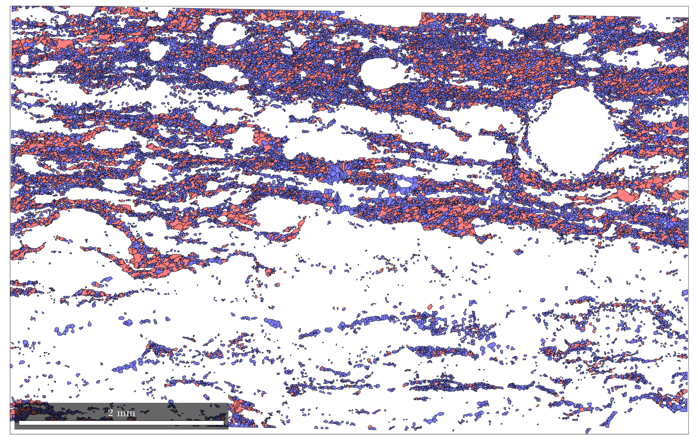
**

**SIP16:**

**
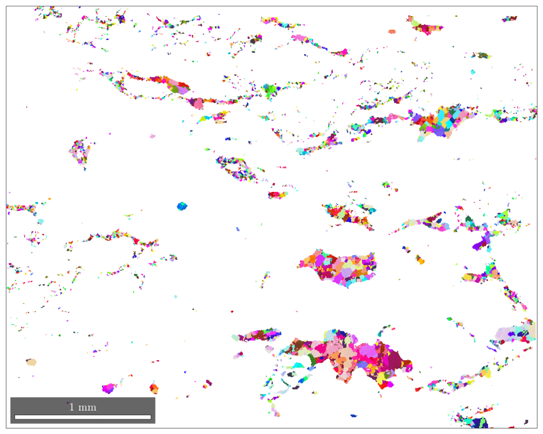

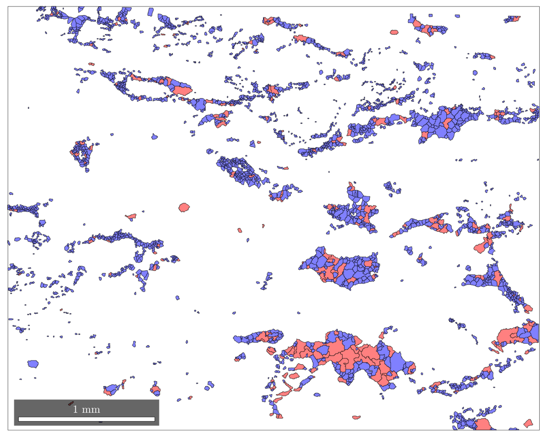
**

**SIP15:**

**
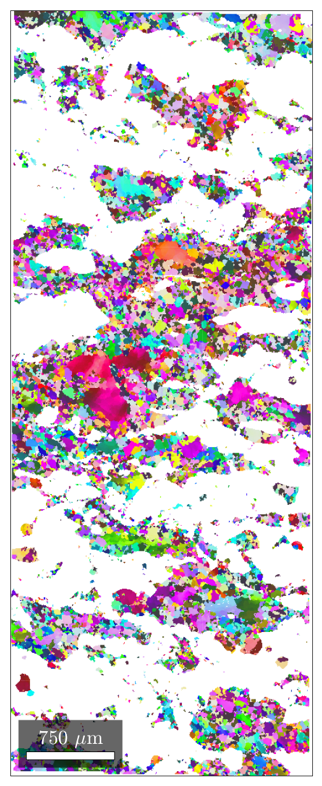

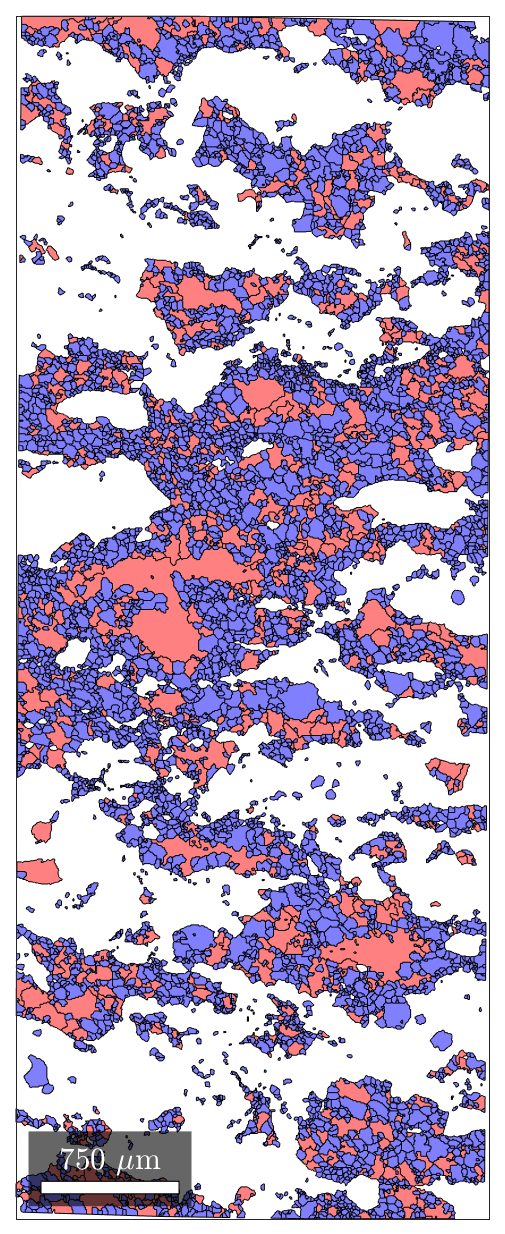
**

**SIP43:**

**
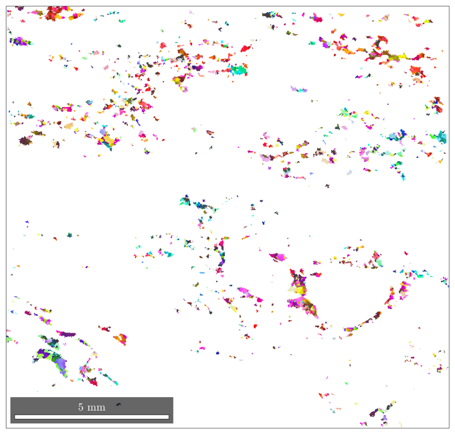

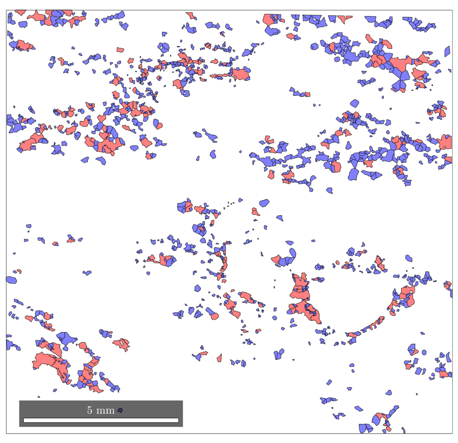
**

**SIP12:**

**
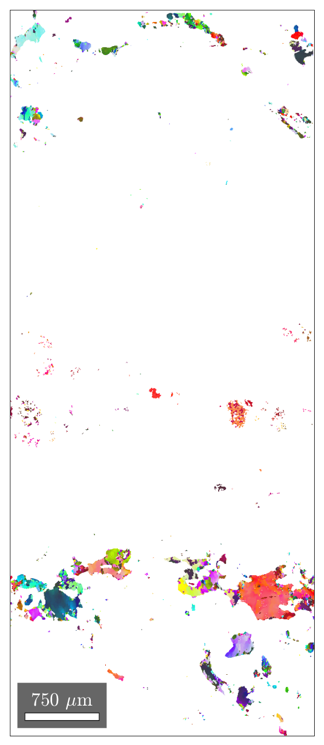

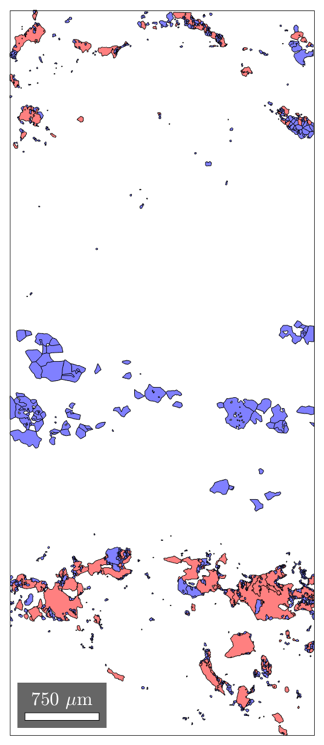
**

**SIP11:**

**
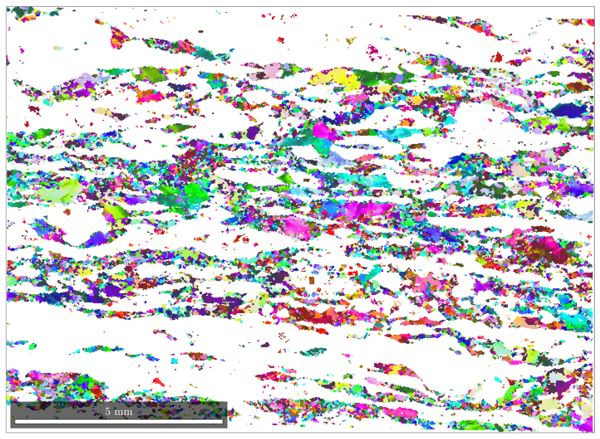
**

**
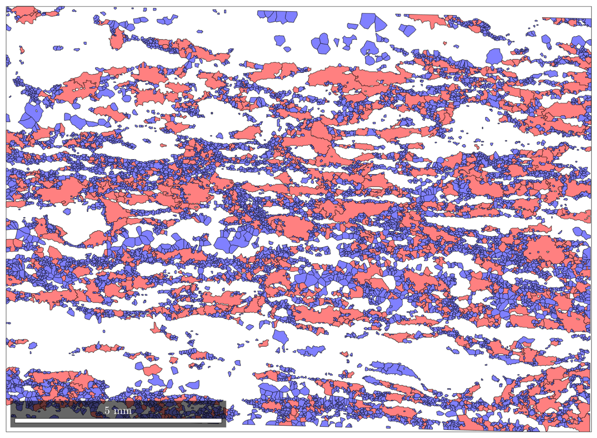
**

**Figure S3:** Relative frequency histograms of relict and recrystallised grain size for grain maps shown in Figure S2. These plots are generated during GOS analysis in the Cross et al., (2017) scripts.

**
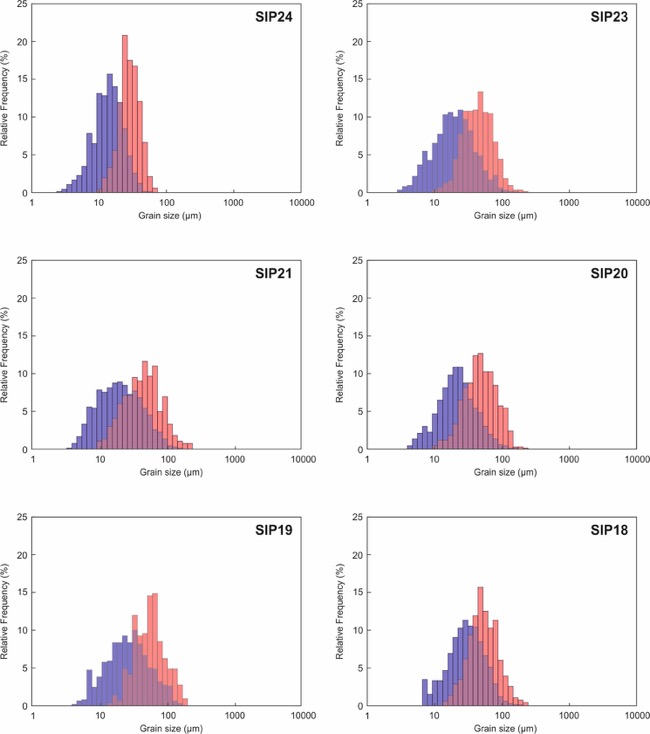
**

Recrystallised grains Relict grains Overlap

**
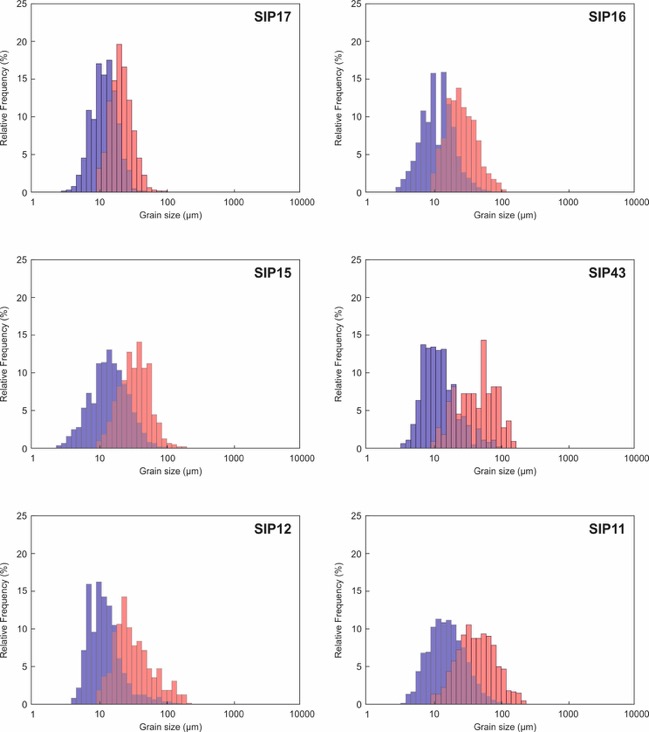
**

Recrystallised grains Relict grains Overlap

**Figure S4:** Point per grain CPO pole figures for quartz-bearing samples within the ØSZ.

| **SIP24** | **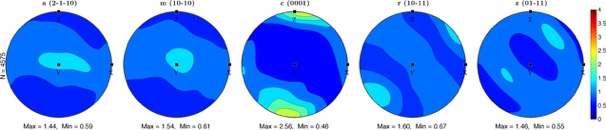** |
| --- | --- |
| **SIP23** | **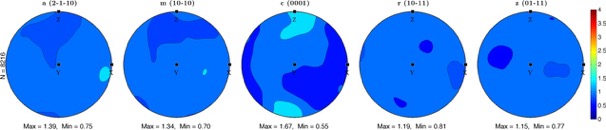** |
| **SIP22** | **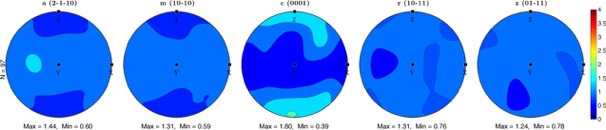** |
| **SIP21** | **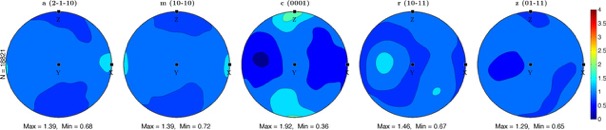** |
| **SIP20** | **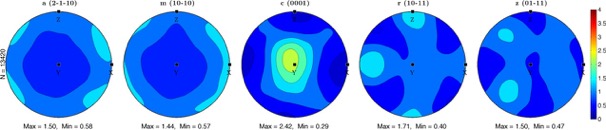** |
| **SIP19** | **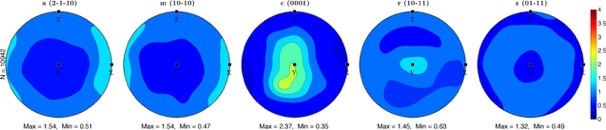** |
| **SIP18** | **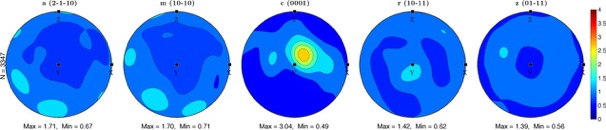** |
| **SIP17** | **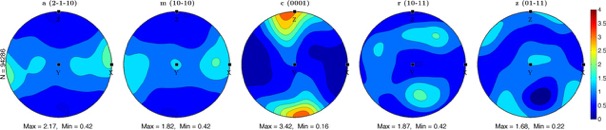** |
| **SIP16** | **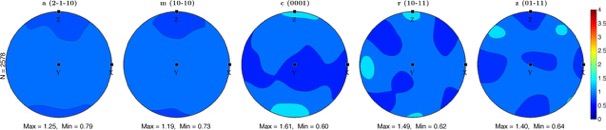** |
| **SIP15** | **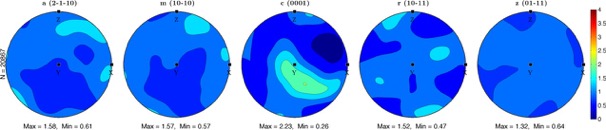** |
| **SIP43** | **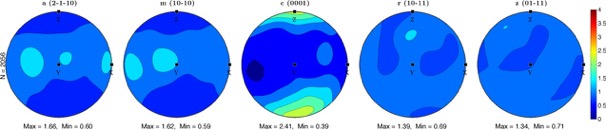** |
| **SIP12** | **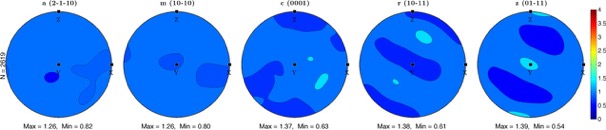** |
| **SIP11** | **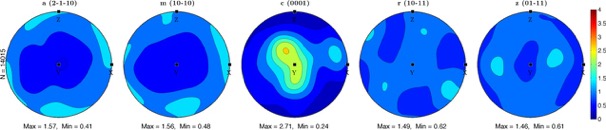** |

**References**

Cross, A. J., Prior, D. J., Stipp, M., and Kidder, S. (2017). The recrystallized grain size piezometer for quartz: An EBSD-based calibration. *Geophysical Research Letters*, 44:6667–6674.

Holness, M. B. (2006). Melt-solid dihedral angles of common minerals in natural rocks. Journal of Petrology, 47(4):791–800.
